# Supplementary material
Source: Springer Nature journal article supplement (https://www.springermedizin.de/resource/supplementary/12913_2009_1071_MOESM2_ESM.pdf/9536270)

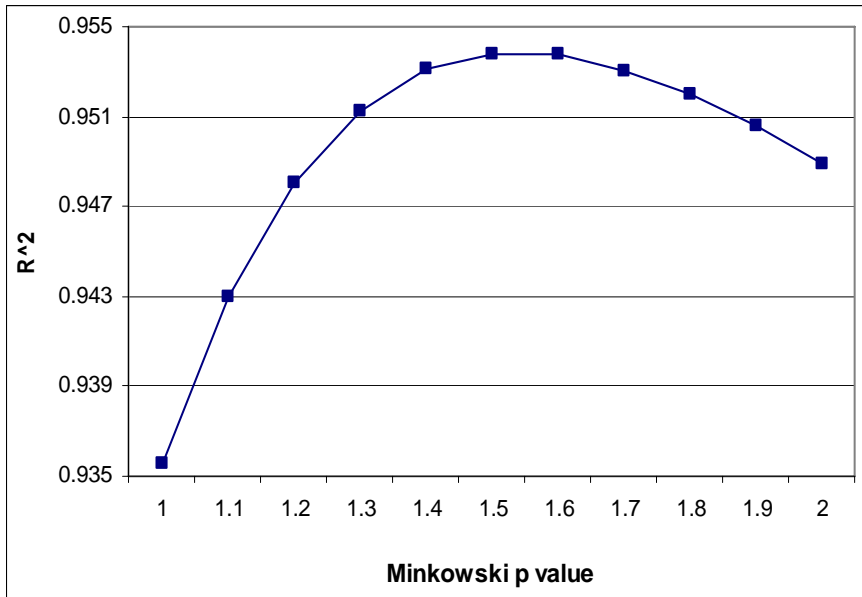

a: Road distance

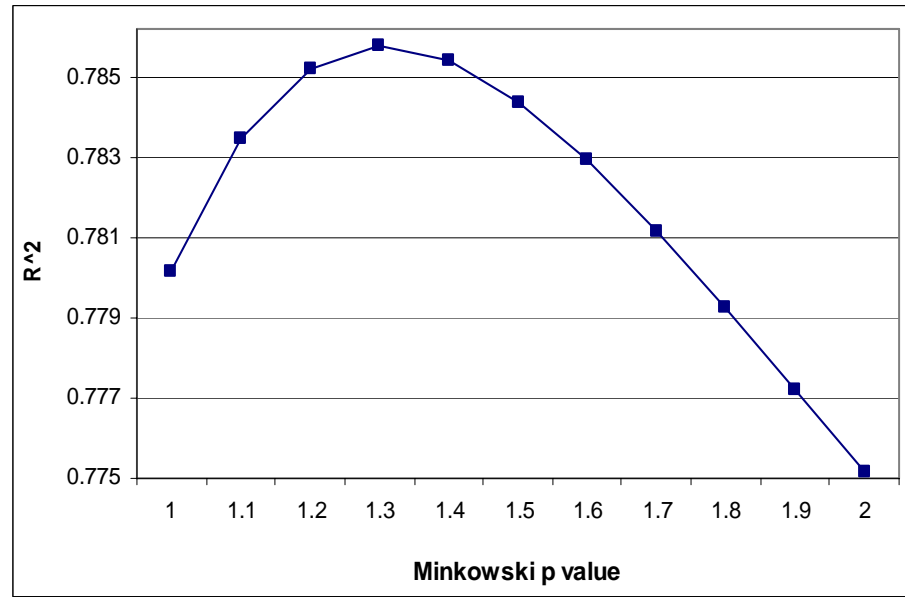

b: Travel time

Supplement: MOESM2 [file 9536270]
